# Supplementary material for: An Improved Method for Cell Type-Selective Glycomic Analysis of Tissue Sections Assisted by Fluorescence Laser Microdissection
Source: Int J Mol Sci. 2019 Feb 6;20(3):700. doi: 10.3390/ijms20030700 (PMC6387264; doi:10.3390/ijms20030700)
Supplement: Supplementary file 1 [file ijms-20-00700-s001.zip › Supplementary Tables.xls]

## Sheet: Table S1
Table S1. Abbreviations and carbohydrate specificities of 45 lectins on LecChip
	Lectin	Origin	Binding specificity
1	LTL	Lotus tetragonolobus	Fucα1-3GlcNAc, Sia-Lex and Lex
2	PSA	Pisum sativum	Fucα1-6GlcNAc and α-Man
3	LCA	Lens culinaris	Fucα1-6GlcNAc, α-Man and α-Glc
4	UEA-I	Ulex europaeus	Fucα1-2LacNAc
5	AOL	Aspergillus oryzae	Terminal α-Fuc, Sia-Lex and Lex
6	AAL	Aleuria aurantia	Terminal α-Fuc, Sia-Lex and Lex
7	MAL-I	Maackia amurensis	Siaα2-3Gal
8	SNA	Sambucus nigra	Siaα2-6Gal/GalNAc
9	SSA	Sambucus sieboldiana	Siaα2-6Gal/GalNAc
10	TJA-I	Trichosanthes japonica	Siaα2-3Galβ1-4GlcNAcβ-R
11	PHA(L)	Phaseolus vulgaris	Tri- and tetra-antennary complex-type N-glycan
12	ECA	Erythrina cristagalli	Lac/LacNAc
13	RCA120	Ricinus communis	Lac/LacNAc
14	PHA(E)	Phaseolus vulgaris	NA2 and bisecting GlcNAc
15	DSA	Datura stramonium	(GlcNAc)n, polyLacNAc and LacNAc (NA3, NA4)
16	GSL-II	Griffonia simplicifolia	Agalactosylated N-glycan
17	NPA	Narcissus pseudonarcissus	Non-substituted α1-6Man
18	ConA	Canavalia ensiformis	α-Man (inhibited by presence of bisecting GlcNAc)
19	GNA	Galanthus nivalis	Non-substituted α1-6Man
20	HHL	Hippeastrum hybrid	Non-substituted α1-6Man
21	ACG	Agrocybe cylindracea	Siaα2-3Galβ1-4GlcNAc
22	TxLC-I	Tulipa gesneriana	Man3, bi- and tri-antennary complex-type N-glycan, GalNAc
23	BPL	Bauhinia purpurea alba	Galβ1-3GalNAc and NA3, NA4
24	TJA-II	Trichosanthes japonica	Fucα1-2Gal, β-GalNAc > NA3, NA4
25	EEL	Euonymus europaeus	Galα1-3[Fucα1-2Gal] > Galα1-3Gal
26	ABA	Agaricus bisporus	Galβ1-3GalNAcα-Thr/Ser (T) and sialyl-T
27	LEL	Lycopersicon esculentum	(GlcNAc)n and polyLacNAc
28	STL	Solanum tuberosum	(GlcNAc)n and polyLacNAc
29	UDA	Urtica dioica	(GlcNAc)n and polyLacNAc
30	PWM	Phytolacca americana	(GlcNAc)n and polyLacNAc
31	Jacalin	Artocarpus integrifolia	Galβ1-3GalNAcα-Thr/Ser (T) and GalNAcα-Thr/Ser (Tn)
32	PNA	Arachis hypogaea	Galβ1-3GalNAcα-Thr/Ser (T)
33	WFA	Wisteria floribunda	Terminal GalNAc (e.g., GalNAc β1-4GlcNAc)
34	ACA	Amaranthus caudatus	Galβ1-3GalNAcα-Thr/Ser (T)
35	MPA	Maclura pomifera	Galβ1-3GalNAcα-Thr/Ser (T) and GalNAcα-Thr/Ser (Tn)
36	HPA	Helix pomatia	Terminal GalNAc
37	VVA	Vicia villosa	α-, β-linked terminal GalNAc and GalNAcα-Thr/Ser (Tn)
38	DBA	Dolichos biflorus	GalNAcα-Thr/Ser (Tn) and GalNAcα1-3GalNAc
39	SBA	Glycine max	Terminal GalNAc (especially GalNAcα1-3Gal)
40	Calsepa	Calystega sepiem	Man and Maltose
41	PTL-I	Psophocarpus tetragonolobus	α-GalNAc and Gal
42	MAH	Maackia amurensis	Siaα2-3Galβ1-3[Siaα2-6GalNAc]α-R
43	WGA	Triticum vulgaris	(GlcNAc)n and multivalent Sia
44	GSL-I-A4	Griffonia simplicifolia	α-GalNAc and GalNAcα-Thr/Ser (Tn)
45	GSL-I-B4	Griffonia simplicifolia	α-Gal
Binding specificities are based on Lectin Frontier Database (LfDB; https://acgg.asia/lfdb2).

## Sheet: Table S2
Table S2. Differential glycomic profiles of UEA-I-stained tissue fragments (0.5 mm2 equivalent each) on PEN- and PPS-membrane glass slides.
	PEN-membrane glass slide						PPS-membrane glass slide
	UEA-I(+)			UEA-I(-)			UEA-I(+)			UEA-I(-)
Lectin	No.1	No.2	No.3	No.1	No.2	No.3	No.1	No.2	No.3	No.1	No.2	No.3
LTL	0.262578	0.153198	0.148604	0.138426	0.184176	0.165414	0.173027	0.126134	0.159309	0.166474	0.196698	0.0243215
PSA	1.23715	1.1199	1.06347	0.966334	1.07536	1.05272	1.14404	1.08004	1.04939	0.705437	0.951926	0.736804
LCA	1.59772	1.52266	1.43795	1.55157	1.49151	1.65482	1.31802	1.46463	1.55544	1.35064	1.55764	1.46058
UEA-I	0.152961	0.22358	0.190868	0.104208	0.0930152	0.0849308	0.228697	0.284313	0.179155	0.0656636	0.0554763	0.143307
AOL	0.342493	0.257244	0.30562	0.257738	0.224667	0.25239	0.199611	0.196785	0.264168	0.184794	0.119609	0.350184
AAL	0.571957	0.5982	0.635743	0.409963	0.413053	0.526037	0.421486	0.399258	0.576613	0.278877	0.392691	0.343948
MAL-I	0.230366	0.18725	0.187915	0.224793	0.253945	0.237982	0.198838	0.182121	0.363774	0.254645	0.246205	0.188752
SNA	1.45066	1.64706	1.50061	1.12886	1.04342	0.759763	1.48072	1.79654	1.70119	0.779711	1.20263	1.92289
SSA	1.6762	1.60433	1.77026	1.28244	0.941022	0.84116	1.78049	1.94165	2.14832	1.1131	1.4559	1.34437
TJA-I	2.24269	2.05363	2.3657	1.62053	1.37578	1.0407	2.76479	2.40449	3.02356	1.16828	1.62727	2.22682
PHA-L	0.225716	0.149021	0.154286	0.234826	0.170617	0.223718	0.194508	0.132543	0.157563	0.180221	0.196802	0.108428
ECA	0.178647	0.167373	0.123893	0.162435	0.119454	0.195867	0.123233	0.115395	0.12298	0.105568	0.146632	0.101084
RCA120	1.3742	1.25555	0.778815	0.471402	1.06588	1.13692	1.1591	1.20731	1.06941	0.714378	0.868513	0.801593
PHA-E	0.922071	0.932896	0.571171	0.86859	0.845437	0.927333	0.759286	0.769011	0.75831	0.630429	0.832547	0.911779
DSA	3.08956	2.93166	2.0534	3.06102	3.23418	3.46661	2.67197	2.68909	2.68461	2.5805	3.41707	2.64311
GSL-II	0.0155588	0.0431404	0.0100301	0.0274439	0.0273352	0.0318279	0.0177103	0.0242054	0.0246202	0.0285746	0	0.040688
NPA	1.79928	2.35539	1.88235	2.81766	2.29313	3.04952	2.08973	2.5382	2.6834	2.58365	2.53378	2.74596
ConA	4.64599	4.37079	4.87972	4.91023	5.67608	6.27238	3.82413	3.64787	4.42766	4.91789	5.41247	4.82413
GNA	0.860601	0.822217	0.852359	1.72037	1.98942	1.38511	1.00437	0.869176	1.10029	1.69598	1.72529	2.49841
HHL	0.60253	0.545161	0.529765	0.475304	0.507459	0.458344	0.611311	0.551401	0.535318	0.462578	0.412663	0.402133
ACG	2.57416	2.38794	1.92553	3.24832	2.74943	2.59445	2.09615	2.08132	1.86494	2.50852	2.96305	2.50113
TxLC-I	0.336658	0.320389	0.230255	0.186414	0.131374	0.147093	0.395034	0.234616	0.249822	0.114201	0.186548	0.133403
BPL	0.202644	0.205724	0.123282	0.180768	0.20245	0.209758	0.294381	0.080502	0.108551	0.258145	0.0984451	0.120013
TJA-II	0.974433	1.22509	0.59998	0.340459	0.490446	0.513923	0.971922	0.856543	0.815845	0.80018	0.379463	0.451741
EEL	0.094804	0.0766066	0.0767021	0.148535	0.110194	0.0920343	0.0811574	0.0930165	0.0963303	0.139996	0.131616	0.0880953
ABA	1.47696	1.96816	2.82776	2.04511	1.373	1.59395	1.76654	1.78714	1.73891	2.09468	1.67007	1.67492
LEL	1.85769	2.06168	2.26799	2.31208	1.98471	2.57688	2.16683	2.42258	2.53583	1.29816	2.78185	2.27523
STL	1.53646	1.2165	1.31471	1.27271	1.53896	1.23074	1.5705	1.43025	1.14727	1.32716	1.27847	1.19008
UDA	3.926	3.65436	3.39934	3.62921	3.72121	3.56253	4.12311	3.63426	4.15417	3.73393	3.77724	3.44129
PWM	0.22379	0.123272	0.153267	0.0900893	0.0807091	0.0833988	0.267296	0.210428	0.0162772	0.0968741	0.0389158	0.0898422
Jacalin	2.21755	2.27491	2.50832	2.10951	1.77534	1.75246	2.56491	2.50263	2.38417	1.78459	2.19621	2.10022
PNA	0.0623788	0.0645984	0.0251998	0.0595337	0.0677498	0.0902881	0.0659608	0.0310833	0.0586957	0.0432711	0.0927283	0.0758409
WFA	0.161178	0.17244	0.17336	0.127062	0.100269	0.0988003	0.159435	0.10608	0.157845	0.117361	0.130465	0.153469
ACA	0.795802	0.897122	1.05356	0.998042	0.808021	0.976102	0.971592	0.778376	0.785797	0.82179	0.736216	0.638133
MPA	0.398886	0.622204	1.39812	0.721335	0.318763	0.446483	1.09197	1.1092	0.814342	1.31329	0.359078	0.3398
HPA	0.614629	0.776795	0.815906	0.696958	0.966042	0.875321	0.587696	1.00614	0.413432	0.680826	0.622414	0.930558
VVA	0.0946296	0.069546	0.12068	0.0438044	0.0652742	0.0501426	0.0751687	0.0586479	0.0753648	0.0648775	0.0745347	0.0543555
DBA	0.0350429	0.0274855	0.0357046	0.0413347	0.0788074	0.0412907	0.0264757	0.0196065	0.0263477	0.0246577	0.0425466	0.0633212
SBA	0.0486531	0.0551414	0.0379352	0.036027	0.0514288	0.0263913	0.0440217	0.042853	0.0546576	0.0679592	0.0235476	0.0375768
Calsepa	1.05952	1.49876	1.52391	1.40302	1.35731	1.30474	1.39358	1.32084	1.25819	1.44459	1.28515	1.36792
PTL-I	0.077362	0.0162777	0.0694531	0	0.0501087	0.0359519	0.0552018	0.0243535	0.0712436	0.0524357	0	0.0231247
MAH	0.258686	0.318829	0.311783	0.430347	0.406634	0.406914	0.350506	0.321542	0.361071	0.470579	0.440001	0.63499
WGA	2.00626	Griffonia simplicifolia	2.46363	2.30734	2.35836	2.30578	1.81529	2.07648	1.91042	1.93581	2.33174	1.68713
GSL-IA4	0.114858	0.112766	0.182101	0.149448	0.169879	0.20959	0.0910653	0.170273	0.155164	0.12836	0.149401	0.193678
GSL-IB4	0.0720245	0.0394045	0.0189879	0.0183924	0.0385787	0.0514607	0.038164	0.0697309	0.0321322	0.0235468	0.0556783	0.0373242
Data after mean-normalization are indicated.

## Sheet: Table S3
Table S3. Differential glycomic profiles of tissue fragments (0.5 mm2 equivalent each) obtained from the hematoxylin- and UEA-I-stained sections
	Hematoxylin				Hematoxylin (+antigen retrieval)				UEA-I/Hematoxylin (+antigen retrieval)
Lectin	No.1	No.2	No.3	No.4	No.1	No.2	No.3	No.4	No.1	No.2	No.3	No.4
LTL	0.217541	0.107474	0.108118	0.0606656	0.283787	0.185981	0.0809455	0.237304	0.182949	0.207265	0.242647	0.179444
PSA	1.00643	1.06971	0.945447	1.04961	0.816696	0.833335	0.738809	0.775268	0.90359	0.658542	1.05128	0.741884
LCA	1.14518	1.4119	1.14402	1.32199	1.146	1.18252	1.12655	1.24581	1.21637	1.11313	1.15397	1.03579
UEA-I	0.0827718	0.135913	0.0448324	0.0350634	0.207234	0.214954	0.132918	0.171629	0.146769	0.186786	0.167866	0.4386
AOL	1.16836	1.21382	1.20383	1.21082	1.94326	2.06437	2.09513	2.25127	1.86572	2.62689	1.42358	2.10534
AAL	1.906	1.87705	1.87122	2.0222	2.922	3.03414	3.25754	3.69125	2.85844	4.35997	2.33418	2.80472
MAL-I	0.247348	0.406228	0.231323	0.267736	0.291245	0.23661	0.198191	0.156673	0.284002	0.182788	0.295482	0.30668
SNA	1.04078	1.29552	1.1813	1.57562	1.40068	1.26826	1.20418	1.56306	1.57038	1.45426	1.79239	2.19416
SSA	1.17516	0.994891	1.13685	1.24121	1.31845	1.21376	1.16294	1.42764	1.35797	1.39164	1.62788	1.94378
TJA-I	2.02484	2.00524	1.87796	2.0264	1.81219	1.97714	1.51164	2.22283	2.23724	1.83653	2.17188	2.899
PHA-L	0.250129	0.105521	0.149595	0.118923	0.140855	0.0867987	0.126697	0.0564583	0.157638	0.121045	0.13297	0.123358
ECA	0.0882459	0.0699737	0.0501285	0.0279086	0.127965	0.0884765	0.122817	0.0610401	0.12146	0.0331379	0.0669041	0.114833
RCA120	0.990597	1.00513	0.927918	0.801597	0.759895	0.970454	0.916974	0.929081	0.930844	0.906538	1.07045	1.53653
PHA-E	0.887129	0.943487	1.09973	1.08665	0.822592	0.750286	0.599856	0.814892	0.753496	0.758984	0.822914	0.809792
DSA	2.69653	2.70011	2.97507	3.07967	2.55338	2.55336	2.45265	2.23964	2.43762	2.32116	2.37931	2.32818
GSL-II	0.0359281	0.0596293	0.0219019	0.0334272	0.0666827	0.0746496	0.00722531	0.0318931	0.107298	0.0708552	0	0.00739645
NPA	2.69199	2.90922	2.84472	2.77913	1.26316	1.58958	1.35945	1.26701	1.58752	1.15696	1.10834	0.969055
ConA	3.47901	3.44501	3.10951	3.09402	4.03382	3.95246	4.65733	4.28721	3.74549	4.60592	4.72102	3.02485
GNA	1.48402	1.43445	1.47139	1.20055	0.779489	0.934836	0.892465	0.5593	0.756227	0.894329	1.05619	0.772661
HHL	0.564584	0.554622	0.516175	0.547808	0.512909	0.429158	0.652597	0.415003	0.499538	0.36686	0.320136	0.622807
ACG	2.48798	2.68365	2.7729	2.68708	3.92042	3.87052	4.29297	3.61699	3.47508	3.79254	4.66799	3.0539
TxLC-I	0.243777	0.212505	0.179318	0.167914	0.184714	0.169285	0.406145	0.121268	0.15766	0.104372	0.173744	0.286124
BPL	0.103309	0.108574	0.119086	0.0451265	0.256232	0.166365	0.102542	0.163555	0.152429	0.145044	0.190149	0.155457
TJA-II	0.448327	0.445338	0.457545	0.414814	0.630579	0.697957	0.447456	0.700355	0.667442	0.581748	0.638212	0.97886
EEL	0.0931915	0.0921591	0.0759093	0.0790404	0.0699286	0.0710895	0.0426747	0.080525	0.178004	0.00757183	0.21887	0.0721224
ABA	1.28323	1.45553	1.46684	1.33839	1.7005	1.69124	2.03525	1.9021	1.57294	1.48543	1.67332	1.74835
LEL	2.18119	2.06329	2.30072	2.60328	2.22488	2.13778	2.70916	2.23042	2.05809	1.93661	1.64244	2.14323
STL	2.16048	1.6666	1.98658	2.18282	1.20921	1.73692	1.19583	1.15991	1.38376	1.20001	1.53599	1.49335
UDA	3.84782	4.00634	3.5766	3.8918	3.36162	3.27297	3.47968	3.05373	3.29433	3.17901	3.10968	3.07781
PWM	0.203064	0.0881791	0.0707764	0.0322006	0.101637	0.0465637	0.193352	0.0619824	0.113687	0.0238623	0.0834729	0.0559792
Jacalin	1.91367	1.80335	2.06007	1.77864	1.83329	2.11634	1.7044	2.09015	2.09171	1.65686	1.52764	1.60723
PNA	0.0435517	0.0367897	0.0632992	0.017785	0.111317	0.0399382	0.0206275	0.0421833	0.0463234	0.00252968	0.056987	0.020403
WFA	0.0589749	0.0613685	0.112522	0.0548215	0.113148	0.0388874	0.0901232	0.147186	0.219652	0.0767945	0.0508287	0.123631
ACA	0.722396	0.623629	0.699542	0.469333	0.864182	0.677562	0.56552	0.840099	0.758348	0.685306	0.822059	0.728779
MPA	0.318047	0.318766	0.38742	0.290265	0.530648	0.455976	0.452044	0.568194	0.509557	0.384195	0.37038	0.602505
HPA	1.17608	1.04617	1.30036	1.17151	1.03478	0.987825	0.897836	0.685858	0.982192	1.23902	0.802829	0.51406
VVA	0.173769	0.0407494	0.0532106	0.0176701	0.055437	0	0.00676021	0.00544557	0.045943	0.020244	0.0283586	0.0201707
DBA	0.177193	0.0240312	0.00864241	0.00692841	0.0776193	0	0	0.0137243	0.0265062	0.0042198	0.0821064	0.0196763
SBA	0.127604	0.0343254	0.0205575	0.00360052	0.0616342	0.00932178	0.0157055	0.0430193	0.0103697	0.000874298	0.00816088	0.035419
Calsepa	1.12403	1.47987	1.10892	1.08678	0.969732	1.03391	1.23574	0.966009	1.24974	0.858777	1.23454	1.18984
PTL-I	0.0229492	0.026655	0.0127224	0	0.0226714	0	0.0013284	0.0152151	0.00786436	0	0.00378403	0
MAH	0.71185	0.763754	0.802003	0.620285	0.405911	0.436328	0.316939	0.566215	0.480336	0.605806	0.499919	0.553011
WGA	2.1032	2.00745	2.34111	2.34575	1.82687	1.65348	1.42455	1.46201	1.71712	1.67541	1.50773	1.48817
GSL-IA4	0.085806	Griffonia simplicifolia	0.0840805	0.0836384	0.161612	0.0465223	0.0519923	0.0145783	0.0710375	0.0682113	0.0947253	0.0579107
GSL-IB4	0.00593947	0.0268885	0.0282685	0.0295073	0.0691235	0.00209111	0.0144611	0.0450315	0.00929243	0.0119808	0.0367122	0.0151541
Data after mean-normalization are indicated.

## Sheet: Table S4
Table S4. Differential glycomic profiles of tissue fragments (0.5 mm2 equivalent each) obtained from the medulla/UEA-I(+) and cortex/UEA-I(-) regions by each method
	Method 1													Method 2													Method 3
	Medulla						Cortex						Pa	UEA-I(+)						UEA-I(-)						Pa	UEA-I(+)						UEA-I(-)						Pa
Lectin	No.1	No.2	No.3	No.4	No.5	No.6	No.1	No.2	No.3	No.4	No.5	No.6		No.1	No.2	No.3	No.4	No.5	No.6	No.1	No.2	No.3	No.4	No.5	No.6		No.1	No.2	No.3	No.4	No.5	No.6	No.1	No.2	No.3	No.4	No.5	No.6
LTL	0.223379	0.044771	0.105663	0.140445	0.0321098	0.110651	0.36439	0.337612	0.260014	0.402759	0.266966	0.309354	0.000154561	0.592933	0.127528	0.101132	0.0424987	0	0.00633784	0.356098	0.205089	0.236361	0.196251	0.265396	0.223606	0.30801	0.443237	0.409723	0.491589	0.346429	0.388006	0.481856	0.764593	0.276995	0.53154	0.392697	0.325039	0.405676	0.771393
PSA	1.14444	1.01315	1.18189	1.08272	1.28947	1.22327	0.89654	0.944258	0.969185	0.926593	0.715108	0.782243	0.00060995	1.35637	1.0277	0.901655	0.960589	1.14979	0.910161	0.746552	0.71562	0.648123	0.568981	0.490346	0.73562	0.000703366	1.09694	0.850738	1.0762	1.09253	1.05236	0.972666	1.01934	0.5823	0.730528	0.690858	0.753953	0.670194	0.00292464
LCA	1.23974	1.49751	1.25854	1.23122	1.32198	1.33222	0.892657	0.890939	1.0245	0.880229	0.853824	0.81945	7.19026e-06	1.56397	1.11752	1.11872	1.03093	1.31675	1.17024	0.913339	0.852751	0.793379	0.757254	0.703703	0.86631	0.000757862	1.37575	1.10858	1.42009	1.24785	1.34044	1.41661	1.17926	0.760231	0.933313	0.759837	0.921418	0.831745	0.000400285
UEA-I	0.242617	0.0342164	0.00613991	0.201518	0.0482774	0.102097	0.0525138	0.0709833	0.0833837	0.093821	0.132977	0.122546	0.756988	0.165769	0.135144	0.124525	0.0479741	0.0804222	0.026941	0.0953232	0.0855613	0.0893093	0.0780229	0.0970704	0.106895	0.835679	0.255859	0.317193	0.520098	0.297881	0.321017	0.331404	0.162586	0.137561	0.13128	0.109944	0.0802248	0.147394	0.000304072
AOL	1.24326	1.2193	0.935094	1.31712	1.27631	1.35873	1.17432	1.36885	1.10544	1.18431	0.818811	0.998716	0.261084	1.27391	1.05682	1.15733	1.18777	1.41661	1.11683	0.879714	0.794063	0.946901	0.667968	0.884963	0.893707	0.00030259	1.31007	1.18402	2.24072	1.24252	1.41733	1.32186	0.995032	0.877762	1.2233	1.07835	1.24573	0.933372	0.0453812
AAL	1.49498	1.91112	1.85395	1.30239	1.70468	1.8468	0.788229	0.870899	1.25487	0.810308	0.615453	0.684741	8.64473e-05	1.6768	1.9122	1.38487	1.52618	2.03181	1.44807	0.909335	0.862386	0.951631	0.651194	0.661872	0.81803	2.87255e-05	1.75245	1.59658	2.59651	1.6131	1.67071	1.7307	0.977349	0.951462	0.935915	0.86363	1.11667	0.760096	0.000276168
MAL-I	0.380032	0.0323491	0.0378947	0.536653	0.318486	0.219546	0.7396	0.885079	0.435548	0.779815	0.655295	0.71106	0.00136041	0.298896	0.206497	0.271046	0.257045	0.23602	0.199069	0.49496	0.405807	0.400544	0.514554	0.502861	0.445853	8.12949e-06	0.29042	0.298164	0.229711	0.330579	0.358365	0.334698	0.362235	0.472995	0.578955	0.702926	0.597514	0.683666	0.000937958
SNA	1.87098	1.42246	1.07018	1.75597	2.06759	1.9148	1.53346	1.63841	1.18874	1.25316	1.28827	1.44988	0.112139	1.72173	1.05417	1.47455	1.96135	2.43018	1.90792	1.22547	1.16704	1.18988	2.71256	1.42931	1.16028	0.397916	1.69985	1.38178	1.87487	1.95509	1.71579	1.82794	0.792219	1.40408	1.09607	1.20158	1.60395	1.33111	0.0049501
SSA	1.64261	1.35442	1.45907	1.56391	1.8509	2.10002	1.3011	1.40356	0.983697	1.02339	0.865735	1.12286	0.00284985	1.58357	1.26438	1.07423	1.50212	1.83147	1.52281	1.00677	1.02886	1.0479	2.42402	1.00333	0.958566	0.419956	1.56532	1.36646	1.6682	1.73234	1.43135	1.62303	0.655026	1.13114	0.814699	0.866414	1.17715	1.23279	0.000367248
TJA-I	3.03421	2.54825	2.19762	2.7506	3.15636	3.27598	2.16646	2.11922	1.69033	1.77587	1.76741	1.7682	0.00048423	2.84882	1.8469	2.20009	2.43134	2.95863	2.23148	1.87628	1.5612	1.62213	3.49771	1.68848	1.59151	0.234532	1.94506	1.85478	2.04369	2.11531	1.81831	1.84838	1.44645	1.44117	1.35596	1.47367	1.70056	1.69553	0.000274567
PHA-L	0.280336	0	0	0.315767	0	0	0.706972	0.762079	0.370768	0.753244	0.589391	0.625448	0.000106583	0.357304	0.0816707	0.140696	0.0354137	0	0.0404692	0.596939	0.48785	0.505189	0.439704	0.638448	0.475628	5.36285e-05	0.288063	0.318931	0.242542	0.330519	0.363949	0.349493	0.803729	0.541443	0.812346	0.823141	0.699168	0.80095	4.6125e-06
ECA	0.208986	0	0	0.14068	0	0	0.562481	0.475187	0.298219	0.532766	0.461961	0.477846	1.6639e-05	0.297016	0.166253	0.0910009	0.0263642	0	0	0.392296	0.361601	0.351749	0.328121	0.379879	0.321554	0.000363438	0.335118	0.269921	0.247397	0.306795	0.309748	0.256066	0.666776	0.374145	0.457424	0.443963	0.399127	0.496242	0.00204014
RCA120	1.10117	1.41715	1.09148	1.09719	1.10613	1.21501	1.07511	1.12448	1.1232	1.0281	0.844055	0.986239	0.0652966	0.80658	1.21163	1.02031	0.981721	1.19247	0.825249	0.884054	0.90772	0.987207	1.95429	0.782197	0.879353	0.764443	0.951371	2.36558	1.3724	1.0363	0.879599	0.781761	0.91256	0.789087	0.759082	0.732358	0.768681	0.811359	0.10302
PHA-E	1.0705	1.13397	0	0.949071	1.04548	1.03776	1.08936	1.03254	1.43934	0.9619	1.11782	0.897862	0.285869	0.603201	0.680084	0.869234	0.676635	0.805711	0.589308	0.85126	0.783142	0.837281	1.29105	0.826242	0.764772	0.0700415	0.666955	0.681142	0.887467	0.691915	0.812189	0.688632	0.763474	0.599022	0.763307	0.730727	0.705672	0.710802	0.572782
DSA	1.84286	2.66796	2.02036	2.62805	2.15614	2.10142	1.3289	1.23614	1.92258	1.38157	1.45131	1.30003	0.000869055	1.49658	2.07004	1.51474	1.64855	1.47722	1.5822	1.30273	1.27139	1.06336	1.1205	1.02649	1.35403	0.00206821	1.62377	1.62149	1.54839	1.62965	1.44134	1.6164	1.6424	1.48964	1.41698	1.25215	1.28974	1.15808	0.0253469
GSL-II	0.0706423	0	0	0.120416	0	0	0.452795	0.472319	0.141309	0.473197	0.379991	0.347901	0.000103314	0.00492606	0.023008	0.00133903	0	0	0	0.278023	0.253068	0.26022	0.291767	0.35058	0.275165	3.61161e-09	0.110484	0.125137	0.0776092	0.113963	0.153553	0.0806131	0.205394	0.272323	0.330879	0.370772	0.340667	0.351089	2.73355e-05
NPA	2.40216	2.39621	2.72592	3.31399	3.7108	3.35994	2.5295	2.88413	2.685	3.29061	4.68017	4.48814	0.342829	4.84747	4.91809	5.4921	5.5072	4.35267	5.18397	5.77838	5.05372	4.93269	3.36661	6.112	5.32526	0.919499	3.10813	3.88631	2.1076	2.84311	3.32498	3.81831	4.44797	4.93537	5.44633	5.94753	5.33125	5.4281	0.000119929
ConA	1.72098	1.70311	1.16764	1.89686	1.8604	2.05539	1.26326	1.56877	1.55114	1.54879	1.43087	1.6041	0.106948	2.01561	2.16607	2.28301	2.20671	2.15361	2.2418	1.65032	1.9287	1.8638	1.3829	1.64953	1.91506	0.000816266	2.56685	2.35187	2.78964	2.40715	2.66202	3.22685	2.65579	1.76061	3.13677	2.30146	2.16637	2.30246	0.252314
GNA	1.25239	0.989729	0.0326675	1.08076	1.29508	1.30567	1.99461	2.24214	1.50583	2.34403	2.79192	2.71661	0.00101973	2.02054	1.61461	2.25699	2.36459	1.75032	1.91173	3.32731	2.76315	2.72252	2.07112	3.52528	2.95905	0.00359556	1.51051	1.71518	1.06896	1.69001	1.77914	2.04704	2.78055	2.42989	3.27287	3.65198	3.29333	3.64888	7.38539e-05
HHL	0.891051	0.547797	0	1.0749	0.659638	0.394849	1.01959	1.12401	0.891938	1.02464	1.03975	0.973485	0.0245462	0.448184	1.59006	0.575593	0.559193	0.692324	0.519864	0.977543	0.865824	0.945604	0.654338	0.909304	0.901033	0.442717	0.680909	0.489576	0.492878	0.560701	0.641273	0.43726	0.929841	0.587379	0.680206	0.804254	0.670758	0.688483	0.0186416
ACG	3.95078	3.8354	3.5297	3.69457	4.38559	3.7786	3.47411	3.29771	3.1645	2.99291	3.51446	3.34195	0.00280791	3.93817	2.03392	3.36815	3.27842	4.28075	3.7374	3.56607	3.51882	2.80222	2.28974	3.16923	3.4463	0.436138	2.87039	3.07629	2.95704	2.97666	2.92764	3.04287	3.45726	2.7686	2.63124	2.79823	3.1395	2.74919	0.704572
TxLC-I	0.275683	0	0	0.244873	0.0126388	0	0.53087	0.425256	0.343573	0.495995	0.416751	0.427185	0.000175693	0.13045	0.292259	0.158043	0.0355174	0.0274573	0.0460823	0.360421	0.387515	0.475863	1.03556	0.420327	0.387403	0.00597335	0.33022	0.309639	0.643921	0.359104	0.277076	0.231236	0.419384	0.397158	0.289861	0.338503	0.285386	0.32258	0.803058
BPL	0.131345	0	0	0.131827	0	0	0.395211	0.318437	0.289961	0.428761	0.336979	0.341562	4.71188e-06	0.00532555	0.178893	0.044546	0.0157583	0	0	0.286388	0.347274	0.413425	0.32784	0.39179	0.342797	3.57926e-06	0.242843	0.253573	0.434496	0.310528	0.257173	0.237838	0.430175	0.355113	0.461221	0.487132	0.354884	0.420236	0.00694712
TJA-II	0.690121	0.34415	0	0.586341	0.395032	0.297277	0.699053	0.749222	0.744708	0.732902	0.644031	0.612629	0.0116888	0.416362	0.70289	0.482199	0.453016	0.453922	0.343347	0.609751	0.591839	0.784858	0.868346	0.598315	0.580696	0.0189521	0.801836	1.13056	0.754088	0.789139	0.761591	0.605187	0.500354	0.654338	0.545696	0.650491	0.691216	0.590979	0.0254954
EEL	0.150951	0	0	0.261817	0	0	0.65686	0.733526	0.332781	0.765481	0.680252	0.64189	2.79206e-05	0.022118	0.332134	0.105467	0.0275999	0	0	0.569276	0.523862	0.59783	0.595868	0.715676	0.529265	7.06301e-06	0.218707	0.271337	0.129442	0.286972	0.266828	0.277209	0.311328	0.482281	0.622529	0.733722	0.587964	0.72147	0.000709012
ABA	1.32349	1.03167	0.12256	1.14906	1.16369	1.1282	1.13111	1.20696	1.46058	1.11128	1.15916	1.24522	0.23619	1.06618	0.628967	1.15988	1.38433	1.43336	1.13865	1.19665	1.27269	1.49641	1.3061	1.06581	1.10547	0.448344	1.77113	1.53164	1.26341	1.63039	1.33955	1.16622	1.0241	0.953018	0.914708	0.910928	1.18349	1.07909	0.00180253
LEL	2.42387	3.26157	2.7061	2.42996	2.97002	3.11009	1.53943	1.57879	2.20419	1.58736	1.65898	1.74062	9.72485e-05	2.3063	3.60333	2.72222	2.8097	2.48452	2.82119	1.60232	2.01651	1.95338	1.70812	1.52643	1.93452	0.000541677	2.14683	1.99867	1.80394	2.18101	1.93177	1.95372	1.78587	1.41257	1.46642	1.46506	1.40103	1.39846	0.000109603
STL	1.27487	3.06323	2.03489	2.97165	1.29272	1.42503	0.876113	0.707752	1.51841	1.01147	0.808321	0.713768	0.014011	0.960872	1.80612	1.28047	1.1973	0.648183	1.28717	0.622241	0.943796	0.904511	0.654485	0.883697	0.93242	0.0508117	0.941512	1.0293	1.00117	0.959129	1.06081	0.944921	1.31586	0.728164	0.88643	0.842682	0.856402	0.766104	0.33487
UDA	1.81399	1.76815	1.30708	1.67157	1.77317	1.52286	1.49909	1.31585	1.60319	1.40872	1.09482	1.34877	0.0325785	1.45262	2.30155	1.56289	1.37135	1.75542	1.59483	1.32954	1.32152	1.40115	1.1467	0.776228	1.31113	0.0199265	1.46512	1.17647	1.573	1.44288	1.45177	1.28431	1.46095	0.943438	0.934327	1.12658	1.04261	0.982755	0.00996558
PWM	0.367623	0.00856983	0	0.409254	0	0	0.822567	0.712847	0.489253	0.744148	0.682295	0.686078	0.000134642	0.132303	0.119215	0.216332	0.101563	0.0168494	0.0255846	0.47464	0.636557	0.548664	0.512835	0.763925	0.581399	2.97421e-06	0.323222	0.342231	0.366606	0.423317	0.454993	0.476475	0.89553	0.616563	0.863569	0.918819	0.81177	0.992274	1.61382e-05
Jacalin	1.38391	1.44201	1.27552	1.22078	1.13555	1.24921	1.1507	1.10704	1.4348	1.08689	1.13257	1.08532	0.127691	1.31851	0.727129	1.31389	1.28964	1.28539	1.62264	1.32129	1.30634	1.4061	1.52817	1.0468	1.27238	0.698746	1.81111	1.43463	1.36675	1.4767	1.28761	1.11905	1.16051	0.888086	1.03526	0.881287	1.24719	1.1685	0.0111197
PNA	0.027512	0	0	0	0	0	0.321466	0.233898	0.133265	0.292176	0.233085	0.227853	5.15949e-06	0	0.00349506	0	0	0	0	0.138211	0.179984	0.32282	0.227132	0.221896	0.189469	8.30944e-06	0.0709557	0.118644	0.14106	0.120894	0.12222	0.0421701	0.180546	0.211184	0.242268	0.222929	0.119956	0.208684	0.00227256
WFA	0.146934	0	0	0.142618	0	0	0.529408	0.526762	0.279061	0.521459	0.443983	0.441086	9.35593e-06	0	0.207458	0.0128927	0.00757002	0	0	0.318836	0.38235	0.436856	0.421798	0.462376	0.356252	4.74964e-06	0.228247	0.242447	0.267652	0.303657	0.355607	0.261534	0.270631	0.560055	0.446305	0.501706	0.445008	0.481975	0.00277577
ACA	0.33456	0.243107	0	0.212922	0.0135918	0	0.37948	0.377524	0.567466	0.48187	0.374497	0.384307	0.00160076	0.233416	0.565382	0.35554	0.363432	0.0153807	0.327129	0.532288	0.6021	0.660287	0.597945	0.534767	0.54122	0.00574576	0.802442	0.787381	0.773888	0.714697	0.740092	0.702996	0.582623	0.666828	0.779996	0.641819	0.694832	0.649995	0.0232924
MPA	0.342392	0.0274038	0	0.366902	0.0461339	0	0.684653	0.758572	0.528834	0.718521	0.642836	0.635669	4.90027e-05	0.178293	0.315436	0.254885	0.288295	0.202035	0.194495	0.697553	0.767098	0.796656	0.836567	0.752044	0.606038	1.97933e-07	0.848753	0.484757	0.347067	0.643163	0.613424	0.42353	0.468999	0.545988	0.753155	0.760507	0.702645	0.850121	0.231351
HPA	0.629238	1.78186	1.0671	0.685233	0.676315	0.936159	0.454638	0.660045	1.31987	0.841975	0.976302	0.762267	0.568673	1.11716	0.953109	1.65783	1.54709	1.02536	1.7069	1.03469	1.40483	1.28687	0.645098	1.41702	1.39898	0.481468	1.25122	1.67629	1.53394	1.3948	1.55048	1.76421	0.99005	0.913563	1.63016	1.11523	0.993437	0.941935	0.00914749
VVA	0.0317622	0	0	0	0	0	0.610776	0.186978	0.106478	0.337326	0.223977	0.227801	0.00340527	0	0.00544689	0	0	0	0	0.101887	0.189887	0.233097	0.227035	0.261229	0.192869	4.86504e-06	0.161471	0.0838166	0.107937	0.20372	0.163872	0.163722	0.494922	0.463707	0.249253	0.303287	0.218846	0.299532	0.00334868
DBA	0.00820534	0	0	0	0	0	0.703465	0.300079	0.159308	0.401195	0.281469	0.29355	0.000891679	0	0	0	0	0	0	0.136688	0.227753	0.203195	0.288233	0.333214	0.234728	6.63285e-06	0.145314	0.130078	0.104165	0.176558	0.211847	0.187326	0.43498	0.261104	0.29039	0.356494	0.296561	0.416268	0.000268221
SBA	0.00236072	0	0	0	0	0	0.351792	0.112472	0.129106	0.218982	0.163923	0.196307	0.000250132	0	0.152859	0	0	0	0	0.0482458	0.131259	0.146399	0.140433	0.151119	0.123915	0.00823889	0.0977158	0.072325	0.0847612	0.144355	0.165506	0.0967053	0.306326	0.233134	0.162583	0.153606	0.101476	0.146441	0.0523217
Calsepa	3.75343	3.8456	3.15793	3.37444	3.77118	3.98237	2.296	2.06971	2.58711	2.23118	2.4532	2.42841	5.15278e-06	2.96589	4.29362	2.95294	3.02036	3.15075	3.53147	2.1182	2.19578	2.23137	1.41909	1.74942	2.216	0.000369944	2.53886	2.13595	2.02944	2.29056	2.35478	2.3319	2.00003	1.88546	1.61293	1.62088	1.71347	1.62316	0.00028254
PTL-I	0	0	0	0	0	0	0.301187	0.171611	0.143394	0.287835	0.257959	0.233838	4.16827e-06	0	0	0	0	0	0	0.115067	0.19368	0.125013	0.194585	0.177999	0.174955	4.28106e-07	0.021686	0.0176985	0.0659456	0.0789973	0.115016	0.0256583	0.0931839	0.138309	0.100561	0.0829929	0.0513101	0.0748315	0.100385
MAH	0.68769	0.393504	0	0.977064	0.560018	0.416703	1.32811	1.37981	1.59655	1.23375	1.5282	1.27121	0.000122485	0.252994	0.445554	0.712386	0.769504	0.349379	0.687376	1.03738	0.95873	1.10635	0.875943	1.3878	1.06969	0.000797798	0.434542	0.532008	0.383463	0.547489	0.555099	0.504646	0.461653	0.588834	0.649623	0.713279	0.695877	0.69005	0.0152098
WGA	1.83674	Griffonia simplicifolia	0	1.84236	1.90453	2.19933	1.30452	1.61813	2.15149	1.49379	1.71389	1.65054	0.799966	2.22286	1.7168	1.88629	2.08537	1.99524	2.50129	1.77711	1.79027	1.61685	1.54352	1.57447	1.82081	0.0109804	1.66228	1.7648	1.67521	1.60849	1.66531	1.62167	1.35604	1.80993	1.08343	1.31438	1.47562	1.42336	0.0280927
GSL-IA4	0	0	0	0	0	0	0.177281	0.132914	0.137747	0.248811	0.182672	0.176675	1.15327e-06	0	0.0568971	0	0	0	0	0.0920598	0.253512	0.196504	0.166788	0.208147	0.199973	2.39973e-05	0.15848	0.101461	0.107745	0.178645	0.273933	0.155599	0.140504	0.147153	0.263255	0.253477	0.213141	0.297462	0.153271
GSL-IB4	0.0552055	0	0	0.126508	0	0	0.380253	0.406476	0.349352	0.456129	0.428298	0.398789	5.57192e-08	0	0.0971555	0	0	0	0	0.1705	0.301503	0.257533	0.273143	0.283012	0.280029	1.90742e-06	0.0779973	0.104869	0.0873071	0.174412	0.214554	0.187734	0.0956225	0.260806	0.277079	0.307751	0.189408	0.316528	0.0378739
Data after mean-normalization are indicated.
a Student's t-tests for comparison of the medulla/UEA-I(+) and cortex/UEA-I(-) regions in the same method. Significant differences (P < 0.05) are highlighted in bold.

## Sheet: Table S5
Table S5. Differential glycomic profiles of tissue fragments (0.5 mm2 equivalent each) of stained and unstained regions with the three probes
	UEA-I						PNA						CK5
	UEA-I(+)			UEA-I(-)			PNA(-)			PNA(+)			CK5(+)			CK5(-)
Lectin	No.1	No.2	No.3	No.1	No.2	No.3	No.1	No.2	No.3	No.1	No.2	No.3	No.1	No.2	No.3	No.1	No.2	No.3
LTL	0.209042	0.158306	0.162539	0.18883	0.261831	0.192893	0.125393	0.125467	0.277012	0.175102	0.194163	0.124253	0.178918	0.146805	0.211395	0.112114	0.153521	0.158196
PSA	1.19381	1.11692	1.04475	1.12392	0.901305	1.02787	1.1159	0.965539	0.957523	0.806586	0.932474	0.973858	1.13315	0.757384	1.06791	0.786631	0.917597	0.667517
LCA	1.56985	1.41566	1.36545	1.47609	1.47241	1.42989	1.53226	1.3943	1.37987	1.37743	1.22592	1.34835	1.41101	1.3129	1.45992	1.16908	0.991306	1.13346
UEA-I	0.22735	0.13198	0.233703	0.0688128	0.111789	0.0450138	0.136694	0.179941	0.216979	0.165557	0.207589	0.111639	0.157233	0.231598	0.151818	0.0720131	0.167408	0.104917
AOL	0.482152	0.335976	0.496314	0.253414	0.349544	0.233085	0.855033	0.866492	1.26802	0.707678	0.599839	0.484764	0.991904	1.27344	1.63339	0.837657	0.957091	0.560346
AAL	0.719856	0.590576	0.668198	0.430146	0.769489	0.498943	1.58042	1.61158	2.21337	1.26601	1.26227	0.948965	1.95198	1.90458	2.64347	1.47759	1.76421	1.28225
MAL-I	0.251369	0.191922	0.248307	0.305124	0.179832	0.232465	0.206937	0.187967	0.186449	0.165069	0.220774	0.233641	0.142193	0.236518	0.202835	0.165517	0.275147	0.135092
SNA	1.68365	1.78188	1.90194	1.27426	1.13616	1.15656	2.16855	1.84086	2.09745	1.33129	1.21886	1.33646	1.40596	1.63473	1.44955	0.825317	1.09999	1.14319
SSA	2.1093	1.9364	1.88793	1.23629	1.05826	1.1785	2.54837	1.96461	1.95255	1.37573	1.27993	1.28487	1.74328	1.92672	1.84929	0.998625	1.22576	1.30733
TJA-I	2.68917	2.59892	2.33241	1.54334	1.38014	1.41422	3.34425	2.69434	2.85591	1.17752	1.68275	1.64775	2.75667	2.89664	2.24741	1.24414	1.69245	1.51165
PHA-L	0.206758	0.170288	0.129795	0.237165	0.220069	0.192082	0.144947	0.115129	0.107838	0.131455	0.2007	0.169955	0.0785308	0.151156	0.158565	0.136154	0.143426	0.135742
ECA	0.192144	0.119973	0.134839	0.189755	0.162274	0.170599	0.17031	0.112888	0.126865	0.166933	0.190943	0.202878	0.0429231	0.134128	0.18266	0.125865	0.177679	0.144833
RCA120	1.36443	0.985389	0.983071	1.08857	1.30236	1.03953	0.704677	1.30189	0.952005	0.909784	0.905534	0.831214	1.23951	0.913793	0.913413	0.667507	0.75485	0.731593
PHA-E	0.991416	0.653438	0.79795	0.945891	0.862916	0.667379	0.707851	0.723818	0.703489	0.616501	0.569234	0.691596	0.760599	0.912133	0.771895	0.842298	0.943987	0.653436
DSA	2.48223	2.09273	3.59653	2.91326	2.84084	3.24576	2.44355	2.65103	2.25252	2.05953	2.40405	2.71183	2.8386	2.88704	2.63304	2.68	3.00162	2.5707
GSL-II	0.0645633	0.0183694	0.0383447	0.122835	0.0315337	0.0598429	0.00913882	0.00945731	0.00804334	0.0133248	0.00203941	0.0439031	0	0.00136712	0.00837778	0.0121757	0.0335586	0.0159309
NPA	1.13744	1.48435	1.93937	2.41743	1.93356	2.27138	1.29955	1.43691	0.982496	1.78087	2.07785	2.59479	1.82959	1.48582	1.1169	3.34953	2.34135	2.7658
ConA	4.76509	4.52491	3.75573	4.8392	6.33503	5.60155	3.61853	4.4226	4.20353	3.81431	4.43879	4.62355	4.40043	3.7492	4.59056	5.06706	4.01432	6.19778
GNA	0.859302	1.00085	0.784629	1.33125	0.79473	1.29428	0.774569	0.70081	0.525304	1.13116	1.1604	1.29669	0.624716	0.591811	0.533136	2.37949	1.25404	1.45051
HHL	0.69146	0.858909	0.60795	0.595268	0.855621	0.513568	0.706291	0.650417	0.45175	0.45829	0.725387	0.558243	0.487022	0.587537	0.487447	0.394974	0.53259	0.547139
ACG	2.57956	2.06087	2.22947	3.8839	2.48765	3.82352	3.20868	3.61252	3.30727	4.0852	4.30991	4.69696	3.86964	3.5654	3.54284	4.45313	4.35213	4.56409
TxLC-I	0.282021	0.317759	0.27744	0.236395	0.24147	0.185026	0.427843	0.246915	0.435344	0.388686	0.182725	0.195218	0.277856	0.363982	0.239355	0.148793	0.253714	0.110434
BPL	0.2135	0.183096	0.221216	0.265148	0.233238	0.21872	0.0700519	0.137513	0.168168	0.174696	0.198914	0.178864	0.0114449	0.0579637	0.126919	0.169586	0.185017	0.172397
TJA-II	0.817612	0.96003	0.865679	0.742845	0.819197	0.471513	0.563807	0.943978	0.665111	0.763591	0.727092	0.390802	0.684105	0.600139	0.647172	0.394997	0.459954	0.507259
EEL	0.0926612	0.0974161	0.105489	0.228039	0.0793206	0.175649	0.0403115	0.0486927	0.0126888	0.0749113	0.103209	0.155273	0	0.0353008	0.00748861	0.14262	0.171474	0.0630508
ABA	1.67371	2.43686	2.12743	1.69031	2.11387	1.78679	1.94995	1.93505	2.50726	2.03011	1.94437	1.8286	1.52934	1.65712	1.45505	1.43383	1.65858	1.56094
LEL	2.13548	2.24779	2.01708	2.16286	2.36084	2.48954	2.19058	2.42185	2.24127	1.90857	2.23868	2.28434	2.00213	2.68369	2.49807	2.17265	2.19143	2.37221
STL	1.59913	1.51	1.42237	1.23431	1.29919	1.43849	1.30332	1.00071	1.1081	0.875867	1.21342	1.00489	1.20512	1.45674	1.1293	1.30639	1.32104	1.46882
UDA	3.68669	3.56563	3.66245	3.47274	3.43186	3.61334	3.3518	3.32947	3.09931	2.73515	3.31548	3.60223	3.7453	3.48688	3.46763	3.15377	3.07265	3.48952
PWM	0.212504	0.132638	0.194357	0.123833	0.147435	0.245615	0.129186	0.0231985	0.0391308	0.08589	0.14679	0.14956	0	0.0592379	0.0666272	0.0971987	0.114014	0.127019
Jacalin	2.17229	2.41378	2.14105	1.91383	2.22363	1.84478	2.34364	2.01227	1.99397	2.4983	2.3451	1.98119	2.39765	1.93853	1.96466	1.98731	2.19247	1.68746
PNA	0.150739	0.0684337	0.0947886	0.079641	0.0476654	0.144354	0.0234979	0.0143464	0.0187739	0.228498	0.101343	0.0643644	0	0	0.0408386	0.0337372	0.242592	0.0439011
WFA	0.17836	0.214745	0.199043	0.132512	0.138437	0.13068	0.0496805	0.119478	0.0772551	0.124113	0.121277	0.103241	0.00990245	0.0273277	0.0995138	0.0987581	0.112073	0.0569614
ACA	0.791596	1.01703	1.05674	0.888451	1.0543	0.835686	0.672533	0.685681	0.831833	0.631116	0.849009	0.702132	0.763025	0.655234	0.686249	0.726715	0.661867	0.707592
MPA	0.608592	0.993501	0.742568	0.582753	0.745252	0.603766	0.604583	0.546366	0.501478	0.548996	0.707762	0.550193	0.296461	0.562778	0.317035	0.399349	0.48372	0.422103
HPA	0.660717	0.612437	0.563733	0.845255	1.19786	0.632392	0.510534	0.610341	0.637653	0.496825	0.755118	0.651941	0.621912	0.978846	0.947318	1.12815	0.566197	0.811101
VVA	0.0920998	0.0603922	0.0777302	0.0271873	0.0799148	0.0149357	0.0188763	0	0	0.0018063	0.0510383	0.0359853	0	0.000224126	0.0201891	0.0165551	0.0474476	0.0479124
DBA	0.0497708	0.0273498	0.0374235	0.0397191	0.0115013	0.0554315	0	0	0	0.0295082	0.0285028	0.0591009	0	0	0.000951725	0.0431309	0.0631424	0.0708497
SBA	0.0584879	0.0579822	0.0560133	0.0414992	0.0303111	0.0394436	0.00243295	0.00458367	0	0.0261518	0.063096	0.0529027	0	0	0.00810286	0.0335738	0.0684083	0.039301
Calsepa	1.28971	1.58581	1.61004	1.27077	1.01272	1.24059	1.22278	1.16631	1.14664	1.31079	1.69409	1.43287	0.992668	0.673167	1.00847	0.851457	1.09937	1.01543
PTL-I	0.0337538	0.0178352	0.00415703	0.0147985	0.0134132	0.0477656	0	0	0	0.00736188	0.0190321	0.0170655	0	0	0.00609872	0.0376919	0.0289936	0.00791354
MAH	0.338186	0.480113	0.366092	0.421292	0.331616	0.282774	0.224063	0.193739	0.217592	0.291945	0.282013	0.274916	0.147935	0.32303	0.187711	0.444887	0.406618	0.335712
WGA	1.36366	Griffonia simplicifolia	1.62183	1.83521	1.68601	1.85081	1.84335	1.93651	2.14687	1.92393	1.90106	2.13675	2.27129	2.09586	2.088	2.13392	2.49727	1.84967
GSL-IA4	0.0944864	0.105001	0.132321	0.153852	0.135018	0.234368	0.0552711	0.047305	0.125294	0.120518	0.192686	0.191031	0	0.0432681	0.117628	0.210028	0.197392	0.177309
GSL-IB4	0.0342885	0.032906	0.0637638	0.0320169	0.0185805	0.0286191	0	0.0071202	0	0.00735471	0.00879223	0.040358	0	0	0.0138031	0.0380163	0.110534	0.0736241
Data after mean-normalization are indicated.

## Sheet: Table S6
Table S6. Summary of significant differences among the glycomic profiles of the medullary regions determined using the three probes
	UEA-I(+) vs PNA(-)		UEA-I(+) vs CK5(+)		PNA(-) vs CK5(+)
Lectina	Ratiob	Pc	Ratiob	Pc	Ratiob	Pc
AAL	-1.44989	0.0108	-1.71594	0.0028	-0.26605	0.3954
ACG	-0.560055	0.0023	-0.676238	0.0007	-0.116183	0.3301
WGA	-0.359863	0.0201	-0.483081	0.0041	-0.123218	0.3353
DBA	-	0.0009	6.91114	0.0009	-	0.998
SBA	4.61954	<0.0001	4.41188	<0.0001	-0.207655	0.9888
GSL-IB4	4.20105	0.0101	3.24604	0.0131	-0.955003	0.9686
VVA	3.60838	0.0014	3.49545	0.0014	-0.112931	0.9987
PNA	2.47125	0.022	2.94258	0.0169	0.471332	0.9713
EEL	1.53926	0.0057	2.78815	0.0015	1.24889	0.344
PWM	1.49416	0.0489	2.09974	0.0244	0.605578	0.8342
WFA	1.26488	0.0177	2.11448	0.0048	0.849604	0.4681
MAH	0.898423	0.0404	0.846504	0.0478	-0.051919	0.9896
AOL	-1.18548	0.0614	-1.56856	0.01	-0.383079	0.3254
BPL	0.71746	0.1582	1.6539	0.0221	0.936441	0.3167
Calsepa	0.343277	0.0953	0.746122	0.0067	0.402845	0.1291
GNA	0.402654	0.0895	0.596069	0.0259	0.193416	0.5953
GSL-II	2.18667	0.0669	3.63752	0.0359	1.45085	0.8712
MPA	0.504793	0.2047	0.995155	0.0379	0.490362	0.4246
STL	0.409315	0.0419	0.257354	0.1648	-0.151961	0.5551
UDA	0.158289	0.0243	0.028696	0.7745	-0.129593	0.056
SNA	-0.186186	0.1495	0.257451	0.0886	0.443637	0.0071
a Only the lectins showing significant difference are indicated.
b Fold changes (log2) calculated using the relative signal intensities (N = 3; Table S5) are indicated. Significant changes (Ratio > 1 or Ratio < -1) are highlighted in bold.
c Tukey’s honestly significant difference tests. Significant differences (P < 0.05) are highlighted in bold.
